# Supplementary material
Source: ML conference proceedings conference paper supplement (https://openreview.net/forum?id=SSr4JOIs5l5)
Supplement: supplementary_material [file attachment]

|   |   |   |   |   |   |   |   |
|---|---|---|---|---|---|---|---|
| 5 | / | 7 | 6 | 5 | 5 | 7 | 2 |
| 4 | 4 | 9 | 2 | 7 | 4 | 2 | 7 |
| 6 | 4 | 4 | 3 | 1 | 3 | 5 | 7 |
| 0 | 2 | 3 | 7 | 9 | 6 | 4 | 2 |
| 3 | 3 | 5 | 2 | 9 | 1 | 1 | 0 |
| 0 | 6 | 8 | 9 | 8 | 3 | 6 | 0 |
| 3 | 3 | 3 | 9 | 5 | 0 | 2 | 2 |
| 8 | 3 | 1 | 1 | 7 | 9 | 8 | 2 |
