# Supplementary material
Source: ML conference proceedings conference paper supplement (https://openreview.net/forum?id=SSr4JOIs5l5)
Supplement: supplementary_material [file attachment]

# Do Bayesian Variational Autoencoders Know What They Don't Know? (Supplementary material)

Misha Glazunov<sup>1</sup>

Apostolis Zarras<sup>1</sup>

<sup>1</sup>Delft University of Technology, the Netherlands

## A SAMPLE STANDARD DEVIATIONS OF THE MARGINAL LOG-LIKELIHOODS

The sample standard deviations of the marginal log-likelihoods for BBB and SGHMC methods can be observed in Figure 1.

## B VAE DISTRIBUTIONS

- For prior we used a standard multivariate Gaussian without parameters:  $p(\mathbf{z}) = \mathcal{N}(\mathbf{z}; \mathbf{0}, \mathbf{I})$
- For variational distribution we used a multivariate factorized Gaussian with learned mean and variance:  $q_{\phi}(\mathbf{z}|\mathbf{x}) = \mathcal{N}(\mathbf{z}; \boldsymbol{\mu}, \text{diag}(\boldsymbol{\sigma}^2))$
- For likelihood we used a multivariate factorized Bernoulli distribution:

$$p(\mathbf{x} | \mathbf{z}) = \prod_{j=1}^D p(x_j | \mathbf{z}) = \prod_{j=1}^D \text{Bernoulli}(x_j; p_j) \quad (1)$$

## C CNN ARCHITECTURES USED

For MNIST and FashionMNIST datasets with a single channel we used the following architectures depicted in Table 1 and in Table 2.

Table 1: Encoder CNN for MNIST and FashionMNIST

| Operation                            | Kernel | Strides | Feature Maps |
|--------------------------------------|--------|---------|--------------|
| Convolution                          | 3 x 3  | 1 x 1   | 32           |
| Convolution                          | 3 x 3  | 1 x 1   | 16           |
| Max pooling 2D                       | 2 x 2  | 2 x 2   | —            |
| Linear for $\boldsymbol{\mu}$        | —      | —       | 10           |
| Linear for log $\boldsymbol{\sigma}$ | —      | —       | 10           |

Table 2: Decoder CNN for MNIST and FashionMNIST

| Operation                       | Kernel | Strides | Feature Maps |
|---------------------------------|--------|---------|--------------|
| Linear for sampled $\mathbf{z}$ | —      | —       | 2306         |
| Upsampling nearest 2D           | —      | —       | —            |
| Max pooling 2D                  | 2 x 2  | 2 x 2   | —            |
| Transposed Convolution          | 3 x 3  | 1 x 1   | 32           |
| Transposed Convolution          | 3 x 3  | 1 x 1   | 1            |

For SVHN and CIFAR10 datasets with three channels we used the following architectures with additional padding = 1 and no bias for every convolutional layer (see Table 3 and Table 4). For SVHN latent dimensionality = 20, for CIFAR10 = 70.

Table 3: Encoder CNN for SVHN and CIFAR10

| Operation                            | Kernel | Strides | Feature Maps |
|--------------------------------------|--------|---------|--------------|
| Convolution                          | 3 x 3  | 1 x 1   | 16           |
| Batch normalization                  | —      | —       | 16           |
| Convolution                          | 3 x 3  | 2 x 2   | 32           |
| Batch normalization                  | —      | —       | 32           |
| Convolution                          | 3 x 3  | 1 x 1   | 32           |
| Batch normalization                  | —      | —       | 32           |
| Convolution                          | 3 x 3  | 2 x 2   | 16           |
| Batch normalization                  | —      | —       | 16           |
| Linear                               | —      | —       | 512          |
| Batch normalization                  | —      | —       | 512          |
| Linear for $\boldsymbol{\mu}$        | —      | —       | 20 / 70      |
| Linear for log $\boldsymbol{\sigma}$ | —      | —       | 20 / 70      |

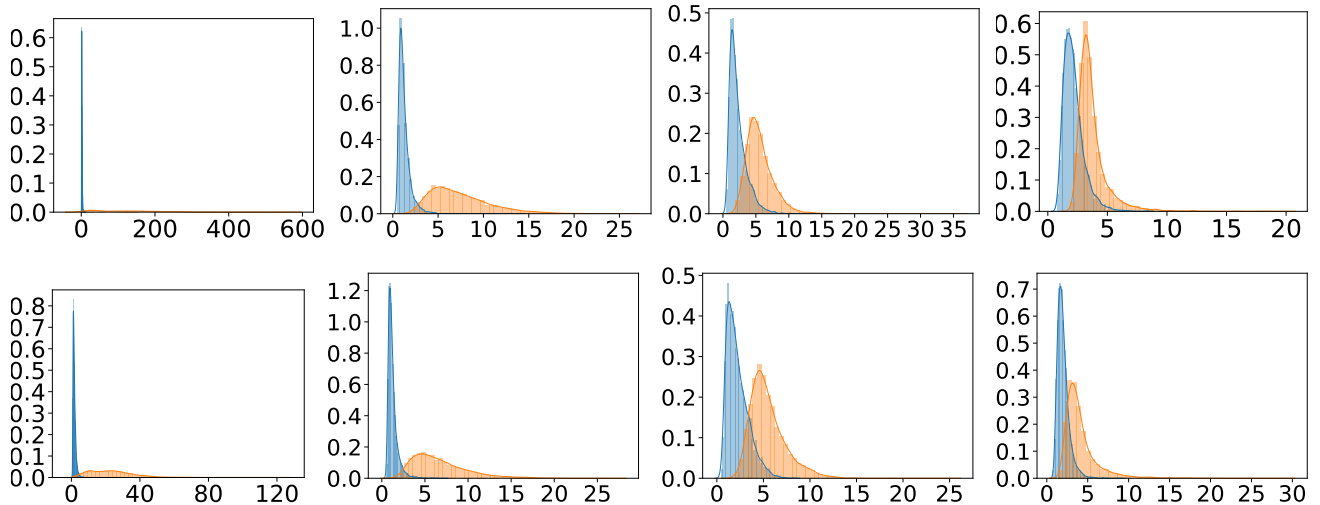

Figure 1: Histograms of the sample standard deviations of the marginal log-likelihoods, blue depicts in-distribution (ID) and orange - out-of-distribution (OoD). **From left to right:** MNIST as ID vs Fashion-MNIST as OoD, Fashion-MNIST as ID vs MNIST as OoD, SVHN as ID vs CIFAR-10 as Ood, CIFAR-10 as ID vs SVHN as OoD. **Top:** Sampling is done from Bayes-by-backprop VAE. **Bottom:** Sampling is done from SGHMC VAE.

Table 4: Decoder CNN for SVNH and CIFAR10

| Operation              | Kernel | Strides | Feature Maps |
|------------------------|--------|---------|--------------|
| Linear for sampled $z$ | —      | —       | 512          |
| Batch normalization    | —      | —       | 512          |
| Linear                 | —      | —       | 1024         |
| Batch normalization    | —      | —       | 1024         |
| Transposed Convolution | 3 x 3  | 2 x 2   | 32           |
| Batch normalization    | —      | —       | 32           |
| Transposed Convolution | 3 x 3  | 1 x 1   | 32           |
| Batch normalization    | —      | —       | 32           |
| Transposed Convolution | 3 x 3  | 2 x 2   | 16           |
| Batch normalization    | —      | —       | 16           |
| Transposed Convolution | 3 x 3  | 1 x 1   | 3            |

Table 5: BVAE runtimes for learning

| Method  | Time (mins) |
|---------|-------------|
| BBB     | 1628        |
| SGHMC   | 1473        |
| SWAG    | 371         |
| Vanilla | 345         |

For all architectures we used ReLU as a non-linearity. In addition, all pixels of the images have been normalized to [0,1] range for each channel for both training and testing phases.

## D SAMPLES FROM TRAINED MODELS

Random samples from all of the trained models for both BBB and SGHMC can be seen on Figure 2.

## E RUNTIMES OF DIFFERENT METHODS

The runtimes for the training convergence for CIFAR-10 (the most complex dataset used in the experiments) for different *Bayesian* methods are available in Table 5

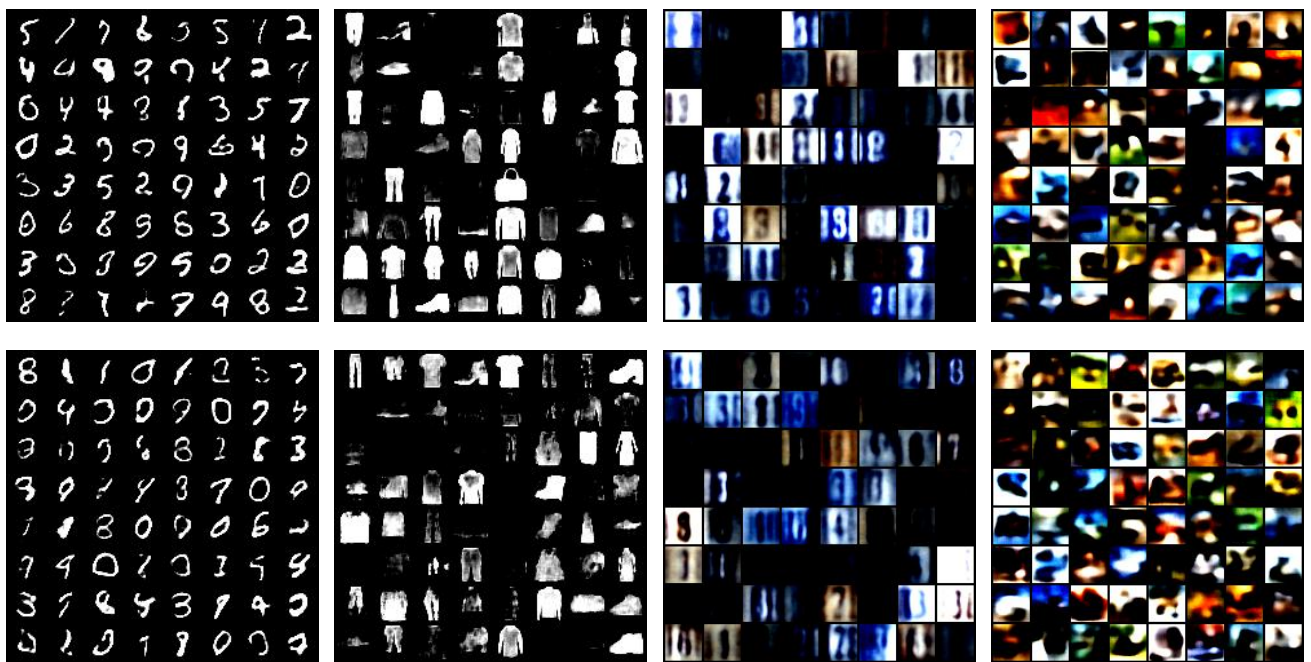

Figure 2: **From left to right:** MNIST, Fashion-MNIST, SVHN, CIFAR-10. **Top:** Random samples from BBB VAE. **Bottom:** Random samples from SGHMC VAE.
